# Supplementary material for: Stimulatory effect of Eucalyptus essential oil on innate cell-mediated immune response
Source: PubMed Central journal article supplement (PMC2374764; doi:10.1186/1471-2172-9-17), 2008-04-18
Supplement: 1471-2172-9-17-S1.pdf [file 1471-2172-9-17-S1.pdf]

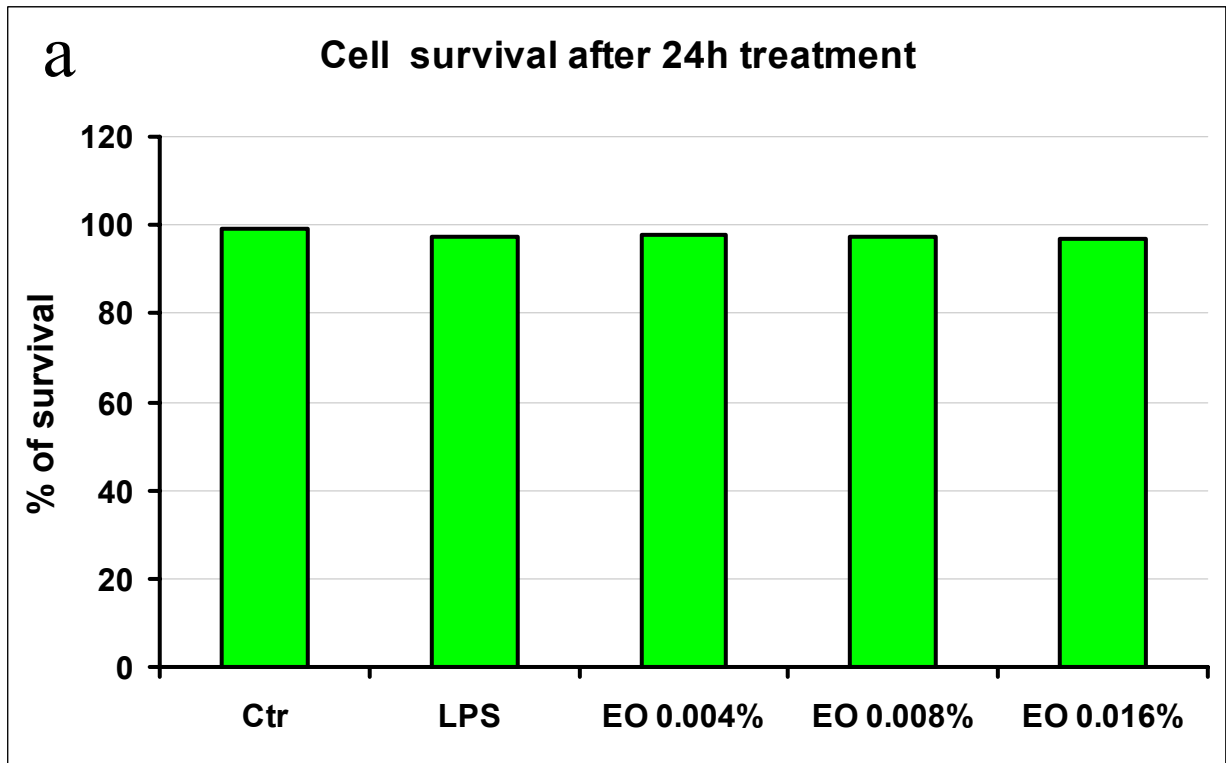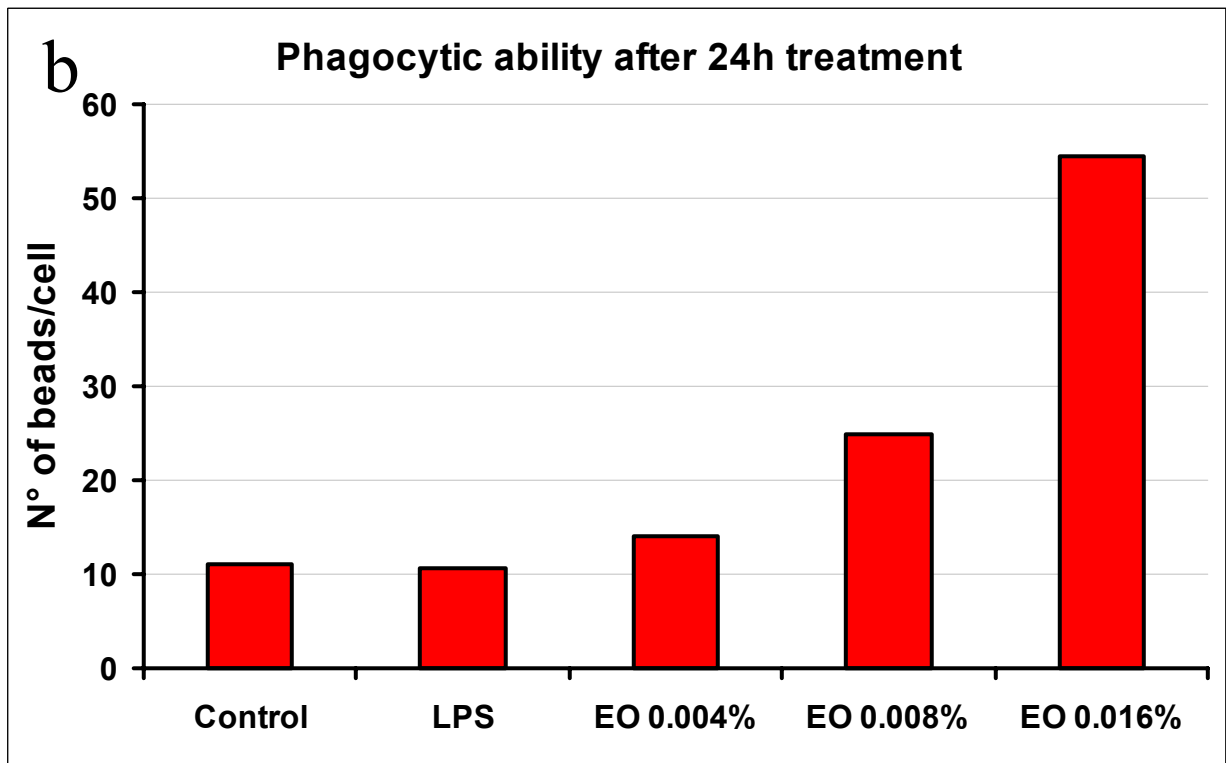

Figure S1

## Figure legend

### Figure S1.

**Dose-response experiment performed to select the lowest, non toxic, effective doses of *Eucalyptus* oil used in the *in vitro* studies.** **a**, MDMs viability after 24h treatment with increasing concentrations of *EO* determined by the Trypan blue dye exclusion method. Cell survival of MDMs culture stimulated with 0.1µg/ml of LPS is also reported. The results, reported as percentage of survival, are the mean of three different experiments. **b**, phagocytic activity of MDMs treated with increasing concentration of *EO* evaluated by adding to cultures  $2 \times 10^7$  beads/ml of fluorescent polystyrene beads. MDMs phagocytic activity of culture stimulated with LPS is also reported. A minimum of 500 cells per sample were observed and results are reported as number of beads per cell.
