# Supplementary material for: Stimulatory effect of Eucalyptus essential oil on innate cell-mediated immune response
Source: PubMed Central journal article supplement (PMC2374764; doi:10.1186/1471-2172-9-17), 2008-04-18
Supplement: 1471-2172-9-17-S2.pdf [file 1471-2172-9-17-S2.pdf]

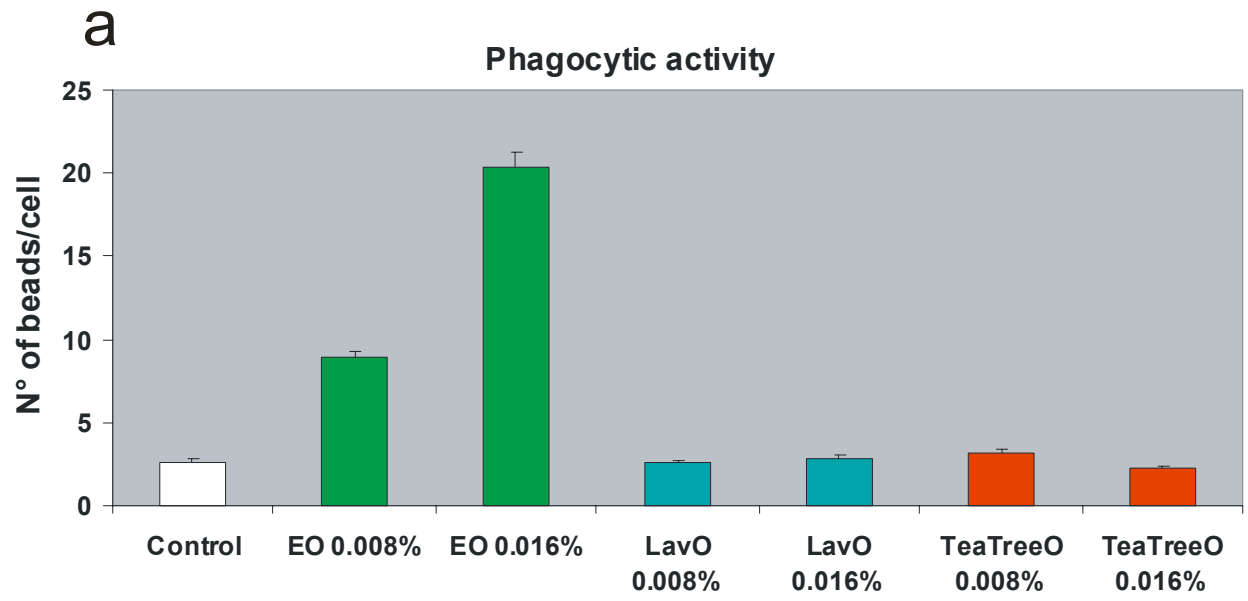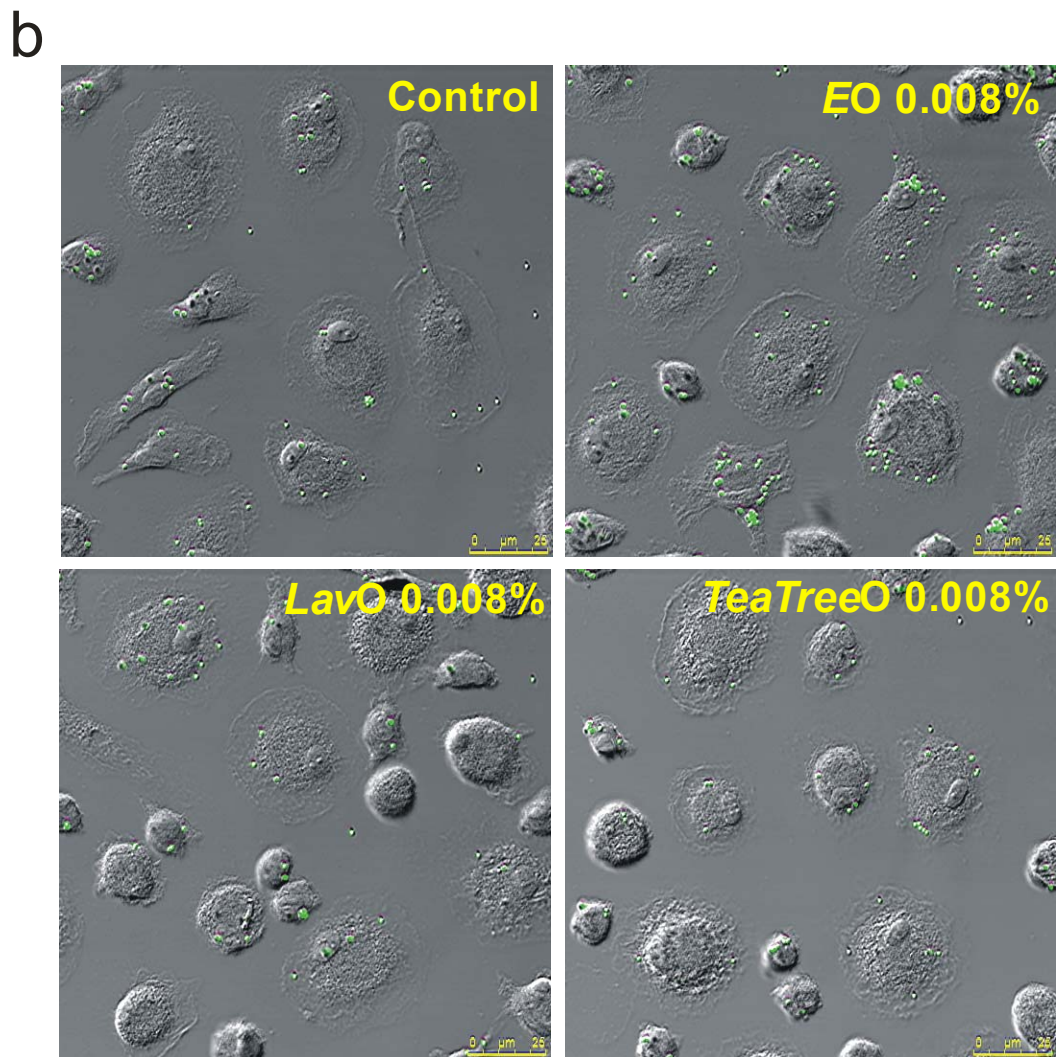

**Figure S2**

## Figure legend

### Figure S2.

***In vitro* effect of Lavender oil (LavO) or Tea Tree oil (TeaTreeO) treatments on phagocytic activity of human MDMs compared to Eucalyptus oil.** **a**, bar graph showing the phagocytic activity of MDMs treated for 24h with 0.008% and 0.016% LavO or TeaTreeO, compared to EO used at the same concentrations. Results are reported as number of beads per cell. **b**, representative images, by confocal microscopy, of untreated control cells and MDMs cultures treated for 24h with 0.008% EO, LavO or TeaTreeO: cell morphology was visualized by differential interference contrast while fluorescent signal of beads was visualized by green hue. Note that the number of beads/cell in EO treated cultures is higher than the control, while in LavO or TeaTreeO treated cells it is similar to the untreated control.
