# Supplementary material for: Stimulatory effect of Eucalyptus essential oil on innate cell-mediated immune response
Source: PubMed Central journal article supplement (PMC2374764; doi:10.1186/1471-2172-9-17), 2008-04-18
Supplement: 1471-2172-9-17-S3.pdf [file 1471-2172-9-17-S3.pdf]

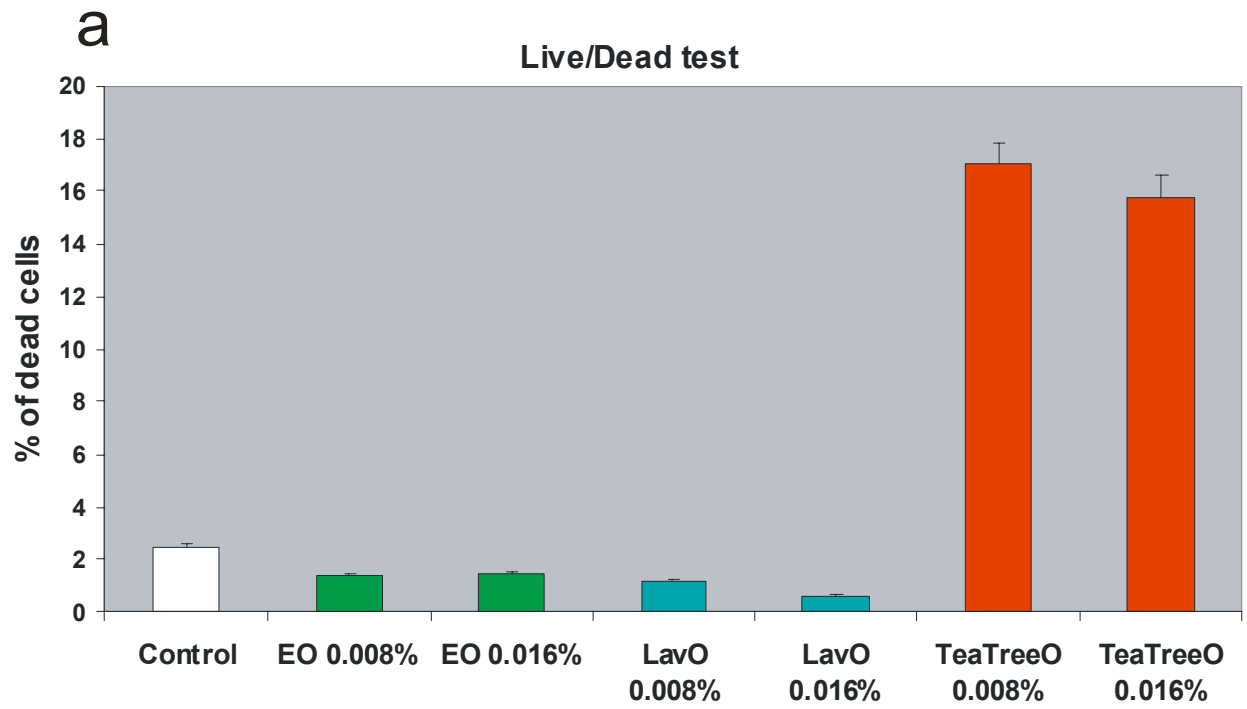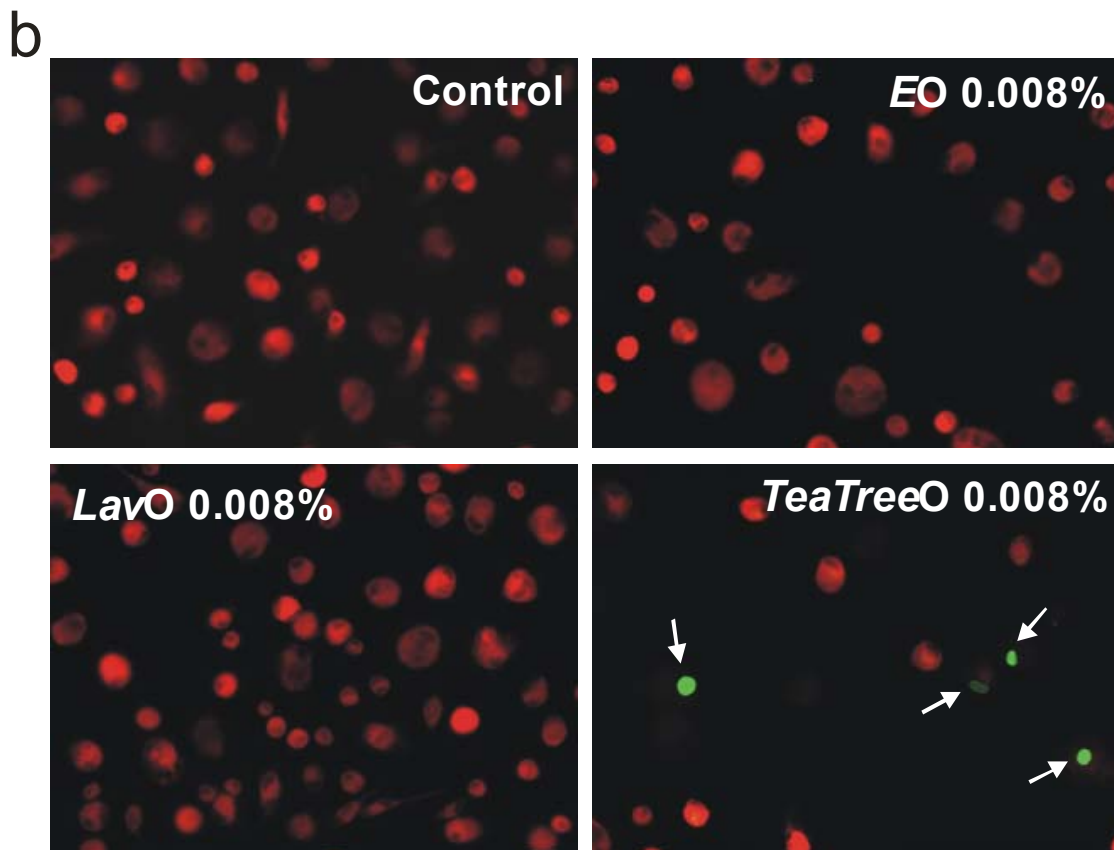

Figure S3

## Figure legend

### Figure S3.

***In vitro* effect of Lavender oil (LavO) or Tea Tree oil (TeaTreeO) treatments on viability of human MDMs compared to Eucalyptus oil.** Cell toxicity was evaluated by confocal microscopy (CLSM) using the two-color fluorescence Live/Dead Viability/Cytotoxicity assay (Molecular Probes, Inc., Eugene, OR) that distinguishes metabolically active cells (cytoplasmic red hue) from injured cells and dead cells (nuclear green hue). **a**, Bar graph showing viability of MDMs treated for 24h with 0.008% and 0.016% LavO or TeaTreeO, compared to EO used at the same concentrations. A minimum of 300 cells per sample were observed, the number of live or dead cells were counted and reported as percent of dead cells. Quantitative assessment was done in a blinded fashion. **b**, representative images, by confocal microscopy, of untreated control cells and MDMs cultures treated for 24h with 0.008% EO, LavO or TeaTreeO: arrows point to dead cells in TeaTreeO treated cultures.
