# Supplementary material for: Stimulatory effect of Eucalyptus essential oil on innate cell-mediated immune response
Source: PubMed Central journal article supplement (PMC2374764; doi:10.1186/1471-2172-9-17), 2008-04-18
Supplement: 1471-2172-9-17-S4.pdf [file 1471-2172-9-17-S4.pdf]

**Table S1. Endotoxin detection by Limulus Amebocyte Lysate (LAL) test**

|                                    | <b>1</b> | <b>2</b> | <b>3</b> | <b>Results</b> |
|------------------------------------|----------|----------|----------|----------------|
| Sterile water                      | –        | –        | –        | Negative       |
| LPS 0.1µg/ml                       | +        | +        | +        | Positive       |
| <i>E. Coli</i> CSE 2ng/ml (1EU/ml) | +        | +        | +        | Positive       |
| <i>Eucalyptus</i> Oil 0.008%       | –        | –        | –        | Negative       |
| <i>Eucalyptus</i> Oil 0.016%       | –        | –        | –        | Negative       |

The *Eucalyptus* oil extract was tested using the Limulus Amebocyte Lysate (LAL) test. The assay was done as a yes/no test. The *Eucalyptus* oil samples and controls were diluted in sterile water, performed in triplicate and run in parallel. Positive controls consisted in 2ng/ml (1EU/ml) *E. coli* Control Standard Endotoxin (CSE) or 0.1µg/ml LPS; negative control consisted in sterile water. In EO extract, tested at both 0.008% and 0.016% concentrations used for the *in vitro* treatment, we did not recorded any endotoxin content.
